## **Therapeutic impact of dance therapy on adult individuals with psychological trauma: a systematic review**

Crystal Tomaszewski (University of Bourgogne/Franche-Comté, Besançon, Fr, University of Lorraine, Nancy, Fr, and LOBA association)

Rose-Angélique Belot (University of Bourgogne/Franche-Comté, Besançon, Fr)

Aziz Essadek (University of Lorraine, Nancy, Fr)

Héloïse Onumba-Bessonnet (LOBA association)

Christophe Clesse (Queen Mary University of London, London, UK)

**Author's Contributions:** C.T. and C.C. conceived and designed the analysis and collected the data. C.T., C.C., R-A.B. and A. E. performed the analysis. C.T. wrote the paper with input from all authors. CC directed and supervised the work on this paper. All authors reviewed the results and approved the final version of the manuscript.

**Declaration of Conflicting Interests:** The lead researcher, Crystal Tomaszewski, is funded by the LOBA association, which launched a dance-therapy protocol. The other author(s) declare no potential conflicts of interest with respect to the research, authorship, and/or publication of this article.

**Funding:** C.T. and H.O-B. are funded by the LOBA association. Other authors received no specific funds.

**Corresponding author:** Crystal Tomaszewski, University of Bourgogne/Franche-Comté, Laboratoire de Psychologie, Avenue Louise Michel, 25000 Besançon, France, +33760123369, [crystal.tomaszewski@gmail.com](mailto:crystal.tomaszewski@gmail.com)

**ORCID iDs:**

Rose-Angélique Belot <https://orcid.org/0000-0001-9348-3707>

Aziz Essadek <https://orcid.org/0000-0002-3683-7019>

Christophe Clesse <https://orcid.org/0000-0003-3042-0770>

**Keywords:** Dance therapy; Psychological trauma; Violence; Post-traumatic stress disorder; Adults; Psychotherapy

## **Abstract**

**Context:** Dance therapy is well suited to clinical settings in which people have difficulty with classical language-based therapeutic devices. Psychological trauma has significant mental, physiological, and somatic consequences, and dance therapy incorporates the adjusted components for its management.

**Objectives:** To identify (i) the potential therapeutic effects of dance therapy in adults with psychological trauma, and (ii) the barriers and facilitators associated with the impact of dance therapy in adults suffering from psychological trauma.

**Method:** Five relevant keyword combinations were used on seven databases. The inclusion criteria are: adults with psychological trauma, dance therapy, and articles published between 2000 and 2022. The exclusion criteria are: children, adolescents, and publications that are not scientific articles. A bias analysis has been conducted on 20 articles using the tools of the NIH and JBI.

**Results:** Thirteen articles have been included, and a thematic analysis has been conducted on the extracted data. The results indicates that dance therapy helps people suffering from psychological traumas to reconnect with their body, express their emotions, improve the management of the psychopathological symptoms, and sometimes even reducing them. The dance group encourages self-expression and establishment of new relationship with others. The feeling of security and the flow state of participants facilitate the emergence of these beneficial effects. These depend on the skill sets of the therapists and the regularity, constancy, and stability of the sessions.

**Conclusion:** Dance therapy is effective in the treatment of psychological trauma, especially for women and people facing migration.

## INTRODUCTION

Since the 1940s, dancing activities has been considered a therapeutic tool in Western societies.<sup>1</sup> Dance therapy interventions hare mainly deployed in health (psychiatric hospitals), social (rehabilitation centers, drop-in centers), and educational (schools) settings.<sup>2</sup> These interventions are carried out by professionals usually working in artistic and/or therapeutic fields.<sup>2</sup> Dance therapy encompasses Dance/Movement Therapy (DMT), defined as "the psychotherapeutic use of movement to promote the emotional, social, cognitive, and physical integration of the individual".<sup>3</sup> Dance therapy mobilizes the individual's cognitive sphere (learning ability, attention, memory, rhythmic motor coordination, and visual-spatial ability), as well as their creative and emotional sphere (movement improvisation through music, imagination, emotion, and social interaction).<sup>4</sup> To date, numerous meta-analyses and randomized clinical trials have evaluated the use of dance therapy and demonstrated its positive impact on physical and mental health.<sup>5,6</sup> Studies have shown that dance therapy is an effective way to improve mental and physical health, especially for individuals without psychopathological disorders (children, adults, and the elderly),<sup>7</sup> with psychopathological disorders (adults hospitalized in psychiatry),<sup>7</sup> and with neurocognitive disorders (neuropsychological deficits, physical and psychological disabilities).<sup>7</sup>

The positive therapeutic effects of dance therapy on the physical and mental health of a varied population make it a relevant psychotherapeutic treatment tool. Because of its emphasis on the body, dance therapy is particularly well-suited to specific clinical settings in which individuals have difficulty using conventional language-based psychotherapeutic approaches.<sup>8,9</sup> Consequently, health and social service institutions are increasingly looking to dance therapy as a means of addressing their patients' needs. The institutions that implement dance therapy protocols and the research institutions that evaluate them consider that this therapy can have a positive impact on individuals with psychological trauma.<sup>10,11</sup> Psychological trauma is defined

as a significant psychological shock, caused by one or more critical events, that has the potential to alter an individual's psychic and physiological functioning.<sup>12,13</sup> Defined thus, psychological trauma includes post-traumatic stress disorder (PTSD)<sup>14</sup> and complex post-traumatic stress disorder (CPTSD).<sup>15</sup> With an estimated prevalence of 3.9% in the general population and 5.6% among people who have been exposed to traumatic events in their lives,<sup>16</sup> PTSD affects women twice as much as men.<sup>16</sup> Psychological trauma particularly affects people facing migration, with the presence of PTSD estimated at between 2.2% and 9.3% in this population.<sup>17</sup> The typical symptoms of PTSD<sup>14</sup> (intrusion, avoidance, disturbances in cognition and mood, changes in arousal and reactivity) are very disabling, especially when mechanisms of traumatic revivification and dissociation phenomena are present.<sup>14</sup> Psychological trauma has significant mental,<sup>14,18</sup> physiological and somatic (cardiovascular system, immune status, metabolic systems and inflammatory responses) consequences<sup>19-22</sup>. Because of these multiple consequences, psychotrauma can be a barrier to therapeutic and medical work<sup>23</sup> since it hinders communication between the caregiver and the patient<sup>24</sup> and contributes to the patient's disengagement from their care process.<sup>23</sup> Consequently, medical care depends on trauma management.

In view of the dimensions (cognitive, creative, and sensory) mobilized by dance therapy and the repercussions (mental, physiological, and somatic) of psychological trauma, dance therapy appears to be a clinical and therapeutic tool of choice in the management of this type of trauma. In particular, the mobilization of the body seems to be important in the psychotherapeutic resolution of psychological trauma<sup>25</sup> and is specifically put to use by dance therapy. Despite this, scientific research is yet to isolate the effects of dance therapy on specific pathologies and populations, and to better understand its beneficial effects on psychological trauma.

The primary objective of this article is to identify the potential therapeutic effects of dance therapy in adults with psychological trauma. Its two secondary objectives are to identify the barriers and facilitators associated with the impact of dance therapy in adults suffering from psychological trauma. The aim is to guide future studies on the effectiveness of dance therapy in the management of psychological trauma, refine the quality of clinical referrals, and provide theoretical support for clinical dance therapy practices.

## **METHOD**

### **Settings**

This qualitative systematic review, registered in PROSPERO under the reference CRD42022306326, is based on the research project VaDDanC, funded by the LOBA association. It concerns the therapeutic impact of dance therapy on adults suffering from psychological trauma.

Articles were selected (Figure 1) via a list of French and English keywords: "dance", "danse", "therapy", "trauma", "intervention", "group", "violence". The authors created five combinations and entered them into 7 databases: Cochrane, Embase, PubMed, Web of Science, PsycINFO, PsycArticles, ScienceDirect. In addition, a filter was systematically applied: publication years from 2000 to 2022.

The inclusion criteria were: adults, carrying psychotrauma, dance therapy; and the exclusion criteria were: children, adolescents, off-topic, book chapters, books, published thesis and dissertations, conference abstracts, guides, expert opinion.

Two researchers analyzed bias using two assessment tools: the NIH and the JBI. When the article design permitted, both tools were used, and the results were cross-tabulated. However, for the case studies only the JBI was used as the NIH does not provide a suitable scale.

Finally, the data extracted from the selected articles (see Table 1 & Table 2) are: authors, date, title, country, objectives, hypotheses, type of article, population, study parameters, type of analysis, main results, associated results, and the authors' main interpretations. The biases of the eligible articles are listed in a second table (see Table 3). A thematic analysis<sup>26</sup> was conducted on the extracted data. All sub-themes were identified, isolated and their recurrence noted. The 14 sub-themes were grouped into 6 themes.

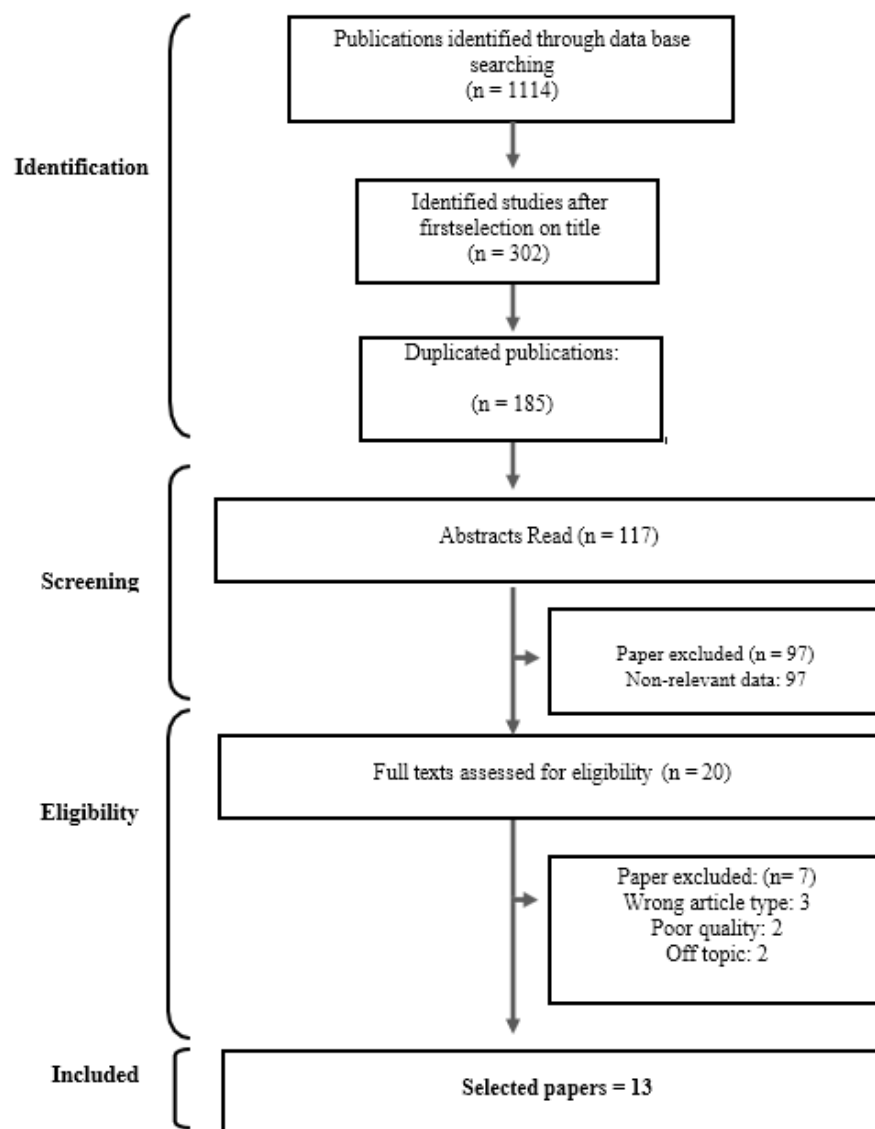

Fig. 1: Flow diagram of selection process

Figure 1. Flow diagram

Table 1

*General presentation of selected articles*

| Study                                       | Design                     | Intervention/Settings                                                                                                                                                                                                                                                        | Population                                                                                                                                             |
|---------------------------------------------|----------------------------|------------------------------------------------------------------------------------------------------------------------------------------------------------------------------------------------------------------------------------------------------------------------------|--------------------------------------------------------------------------------------------------------------------------------------------------------|
| Levine, B., & Land, H. (2015)               | Qualitative meta-synthesis | 5 keywords, 6 databases<br>“5 inclusion criteria: written in English, published during or after 1992, focused on trauma, primary research, qualitative methods only” (p.3)<br>9 studies included                                                                             | Women and men from 5 to 38 years old, with trauma. Samples from 1 to 294 participants.                                                                 |
| Verreault, K. (2017)                        | Qualitative study          | “Four weekly DMT sessions of 75 minutes each, for a period of one month. Led by a DMT practitioner and a Drama therapist as co-facilitator.” (p.123) Observations and exit interviews of the participants                                                                    | “8 female asylum seekers and refugees, from 19 to 50 years [with] traumatic complaints, mostly accompanied by depressive and somatic symptoms” (p.123) |
| Moe, A. (2014)                              | Qualitative study          | Semi-structured interviews of 45 min, with 11 general questions, in 2009 and 2010. “Focused on experience with belly dance” (p.328). 18 face-to-face, 49 by phone                                                                                                            | 20 belly dancer women, from 22 to 68, who disclosed victimization” (p.330)                                                                             |
| Fagnoli, A. (2017)                          | Qualitative study          | Semi-structured interviews of 45min to 1h, audio recorded, with a Bengali interpreter. Starts with meditation, then questions and finishes with movement “to reflect on the interview and their experience of self-care” (p.235)                                             | 6 women survivors of human trafficking, between 22 and 30, and practicing as DMT trainer for at least 5 years.                                         |
| Schaeffer, A., & Cornelius-White, J. (2021) | Qualitative meta-synthesis | 9 keywords, 7 databases<br>Inclusion criteria: peer-reviewed articles published between 2010 and 2020, written in English, on qualitative studies on body-focused therapeutic interventions for refugees, forced migrants, and/or torture survivors.<br>11 articles included | Immigrants, refugees et asylum seekers, from 18 to 57 years old                                                                                        |

|                                                                                               |                                 |                                                                                                                                                                                                                                                                                                                               |                                                                                                                                                                                                                                                                                                                    |
|-----------------------------------------------------------------------------------------------|---------------------------------|-------------------------------------------------------------------------------------------------------------------------------------------------------------------------------------------------------------------------------------------------------------------------------------------------------------------------------|--------------------------------------------------------------------------------------------------------------------------------------------------------------------------------------------------------------------------------------------------------------------------------------------------------------------|
| Koch, S., Wirtz, G., Harter, C., Weisbrod, M., Winkler, F., Pröger, A., & Herpertz, S. (2019) | Quantitative experimental study | Two groups: control (N=16), experimental (N=16)<br>Pre-test form, post-test form + demographic data<br>“Trained music therapist led sessions for the patients twice a week. The control group received treatment as usual.” (p.7) Four different sessions: two in spring 2015 and two in spring 2016                          | 32 traumatized inpatients, men (N=6) and women (N=27) in psychiatric hospital wards, from 18 to 59 years old                                                                                                                                                                                                       |
| Manford, B. (2014)                                                                            | Case study                      | Individual sessions with a DMP therapist, in a psychology and psychotherapy team                                                                                                                                                                                                                                              | 1 woman, diagnosed with borderline personality, hospitalized in a secure hospital                                                                                                                                                                                                                                  |
| Ko, K. (2017)                                                                                 | Case study                      | 10 weekly 60min therapy sessions with movement and verbal processing. Dance with a scarf. “Individual DMT and social services were continued after the 10 sessions.” (p.66)<br>Written notes of the sessions and open-ended questions                                                                                         | 1 woman of 40 years old, with “haan” (similar to trauma in Korea)                                                                                                                                                                                                                                                  |
| Dieterich-Hartwell, R., Haen, C., Kaimal, G., Koch, S., Villanueva, A., & Goodill, S. (2021)  | Qualitative study               | 3 locations, individual (N=5) or group intervention (N=7), recruitment duration of 11 months<br>First meeting with survey (general resources and relationship to body and movement). Then 3 to 5 meetings (60min) to explore and develop expressive movement phrases. Final meeting with another survey (movement experience) | N=13, over 18 years old<br>“with a refugee or asylum-seeker status, a trauma history and had lived in the USA for five years or less” (p.77). Mostly women: 10/13<br>“Exclusion criteria: cognitive impairment, current substance abuse, active psychosis, indication of current suicide or homicide risk.” (p.77) |
| Ley, C., Krammer, J., Lippert, D., & Barrio, M. (2017)                                        | Qualitative study               | Observations of group interventions (one male only and one female only per year since 2013). Group twice a week for three months.                                                                                                                                                                                             | 4 participants, war and torture survivors, over 18 years old, with “post-traumatic stress disorders, depression, anxiety disorders and various other physical psychosomatic and psychosocial impairments” (p.86)                                                                                                   |
| Koch, S., & Weidinger-von der Recke, B. (2009)                                                | Case study                      | Group therapy with verbal trauma therapy methods and elements of dance/movement therapy (DMT).                                                                                                                                                                                                                                | 9 Albanian women, from Kosovo, with post-traumatic stress disorder, depression and anxiety disorders                                                                                                                                                                                                               |



|                                                             |                             |                                                                                                                                                                                                                 |                                                                                                                                                                                                                                                                     |
|-------------------------------------------------------------|-----------------------------|-----------------------------------------------------------------------------------------------------------------------------------------------------------------------------------------------------------------|---------------------------------------------------------------------------------------------------------------------------------------------------------------------------------------------------------------------------------------------------------------------|
| Ho, R. (2015)                                               | Uncontrolled clinical trial | 5 weekly DMT (dance/movement therapy) sessions of 2h. 4 questionnaires + open-ended questions at T0 before, T1 immediately after, and T2 5 weeks after intervention                                             | 21 Chinese women of 25 to 52 years old, who suffered childhood sexual abuse                                                                                                                                                                                         |
| Laird, K., Vergeer, I., Hennelly, S., & Siddarth, P. (2021) | Cross-sectional study       | Online survey from July to December 2019, on duration, frequency and form of conscious dance, mental and physical health conditions, psychological well-being and experiences during and after conscious dance. | Self-identifying adult conscious dancers (N=1003), mean age 47 years old.<br>Health Conditions (N responded):<br>Chronic Pain (N = 867) 255 (29.4%)<br>Depression (N = 864) 298 (34.5%)<br>History of Trauma (N = 864) 511 (59.1%)<br>Anxiety (N = 872) 451 (51.7%) |

Table 2

*Main results*

| Study                         | Type of analysis | Type of therapist                                             | Main results                                                                                                                                                                                                                                    |
|-------------------------------|------------------|---------------------------------------------------------------|-------------------------------------------------------------------------------------------------------------------------------------------------------------------------------------------------------------------------------------------------|
| Levine, B., & Land, H. (2015) | Qualitative      | Dance/movement therapist                                      | Creating awareness of the mind-body connection<br>Increasing the range of movement<br>Creating a new and healthy relationship with the self/therapist/group through the movement process, creating a new and healthy relationship with movement |
| Verreault, K. (2017)          | Qualitative      | Dance/movement therapist and drama therapist (co-facilitator) | Body awareness<br>Safety<br>Religious & spiritual, cultural resources<br>Psychological and religious & spiritual resources<br>Group support                                                                                                     |
| Moe, A. (2014)                | Qualitative      | Facilitators of belly dance                                   | Feeling their body, feeling connected again, reclaiming their objectified body<br>Accepting emotions and fear<br>Way of expressing themselves, self-expression<br>Finding their own interest, retaking power, release of judgment and rigid     |

|                                             |              |                                |                                                                                                                                                                                                                                                                                                                                                                                                                                           |
|---------------------------------------------|--------------|--------------------------------|-------------------------------------------------------------------------------------------------------------------------------------------------------------------------------------------------------------------------------------------------------------------------------------------------------------------------------------------------------------------------------------------------------------------------------------------|
|                                             |              |                                | control, feeling beautiful again, whole and worthwhile, feeling alive, gives confidence and sense of self, sensual, feminine and strong, looking at themselves in the mirror<br>Communal support, social support, communal benefits                                                                                                                                                                                                       |
| Fagnoli, A. (2017)                          | Qualitative  | Dance/movement therapist       | Connection through movement<br>Emotional awareness and release, kinesthetic empathy<br>Self-reflecting, creative process, empowerment and pride<br>Sharing within relationships, balancing life roles through dignity and autonomy                                                                                                                                                                                                        |
| Schaeffer, A., & Cornelius-White, J. (2021) | Qualitative  | Art-therapist                  | Improved physical health<br>Increased bodily awareness<br>Considerations for clinicians and treatment (cultural competence, linguistic barriers, attending to retraumatisation, engagement and attunement, and obstacle to treatment)<br>Improved emotional experiencing<br>Creating safety, ritual, symbolism and metaphor, embodiment<br>Freedom of expression<br>Here and now presence, empowerment<br>Improved interpersonal relating |
| Koch, S, et al. (2019)                      | Quantitative | Music-therapist                | Wellbeing pos and wellbeing neg, perception of general health<br>Perception of physical pain<br>Perception of fitness, body-related self-efficacy<br>Exploration and expression of thoughts, behaviors and emotions<br>Perception of boundaries, embodied intersubjectivity                                                                                                                                                               |
| Manford, B. (2014)                          | Qualitative  | Dance/movement psychotherapist | Experience the body, feelings and behaviors<br>Connection through movement<br>Anxiety and aggression<br>Improving capacity to think and check with her emotional state<br>Creating distance from emotional distress with movement defense mechanisms                                                                                                                                                                                      |
| Ko, K. (2017)                               | Qualitative  | Dance/movement therapist       | Body in pain and shame<br>Wisdom from both moving and silent body<br>Boiling hot emotional container,                                                                                                                                                                                                                                                                                                                                     |

|                                                |                              |                                  |                                                                                                                                                                                                                                                                                                                                                                                                                                                     |
|------------------------------------------------|------------------------------|----------------------------------|-----------------------------------------------------------------------------------------------------------------------------------------------------------------------------------------------------------------------------------------------------------------------------------------------------------------------------------------------------------------------------------------------------------------------------------------------------|
|                                                |                              |                                  | <p>fluctuation of emotions, adding feelings</p> <p>Desire to move forward, stuck in the past</p> <p>Dancing through emotional burden allows expressing emotions, physical expression facilitated, airing of her suppressed emotions</p> <p>Dancing to feel strong and explore resilience, heavy emotions (linked to trauma) are lightened by movement (symbolic in space and form)</p> <p>Need for space</p>                                        |
| Dieterich-Hartwell, R., et al. (2021)          | Qualitative                  | Dance/movement therapist         | <p>Experience of expressive movements, active movement factors</p> <p>Extant resources (cultural, environmental, family)</p>                                                                                                                                                                                                                                                                                                                        |
| Ley, C., et al. (2017)                         | Qualitative                  | Two trainers and a trauma expert | <p>Achieve flow</p> <p>Better affective state</p> <p>Sense of safety and confidence</p>                                                                                                                                                                                                                                                                                                                                                             |
| Koch, S., & Weidinger-von der Recke, B. (2009) | Qualitative                  | Art-therapist                    | <p>Emotional engagement, reducing feelings of shame and guilt</p> <p>Cultural verbal and non-verbal support</p> <p>Inner stability</p> <p>Reintegration of the fragmented and negatively cathected body image, processing trauma starting at a sensorimotor level to activates bodily resources and turning in advance the emotional and cognitive processing of the trauma</p> <p>Group preventing dissociative phenomena and retraumatisation</p> |
| Ho, R. (2015)                                  | Quantitative and qualitative | Dance/movement therapist         | <p>Self-esteem, overattachment dimension of stagnation</p> <p>Awareness of body, personal space, rhythm and pace, feelings and emotions, sense and awareness of inner space, developing new perspectives and positive meaning</p> <p>Mental distress</p> <p>Boundaries and relationship with others</p>                                                                                                                                             |
| Laird, K, et al. (2021)                        | Quantitative                 | Facilitators of conscious dance  | <p>Trait mindfulness, life satisfaction, single statement endorsements, flow state</p> <p>Chronic pain</p> <p>Duration, frequency</p> <p>Depression, anxiety, history of trauma, addiction history</p>                                                                                                                                                                                                                                              |

Tableau 3

*Bias analysis*

| Article                                                                                       | Bias                                                                                                                                                                                                                                                                                                                                                                                                                                                                                                                                              | Quality |
|-----------------------------------------------------------------------------------------------|---------------------------------------------------------------------------------------------------------------------------------------------------------------------------------------------------------------------------------------------------------------------------------------------------------------------------------------------------------------------------------------------------------------------------------------------------------------------------------------------------------------------------------------------------|---------|
| Laird, K., Vergeer, I., Hennelly, S., & Siddarth, P. (2021)                                   | <p>NIH:<br/>                     - Exposure was not assessed more than once<br/>                     - We do not know if outcome assessors are blinded to the exposure status of participants<br/>                     JBI: None</p>                                                                                                                                                                                                                                                                                                              | Fair    |
| Koch, S., Wirtz, G., Harter, C., Weisbrod, M., Winkler, F., Pröger, A., & Herpertz, S. (2019) | <p>JBI:<br/>                     - No multiple measurements of the outcome both pre and post intervention/exposure<br/>                     NIH:<br/>                     - Eligibility criteria not clearly described<br/>                     - The sample was not sufficiently large (to provide confidence in the findings)<br/>                     - People assessing the outcomes were not blinded to the participants' exposure<br/>                     - No multiple measurement before the intervention and after the intervention</p> | Average |
| Ho, R. (2015)                                                                                 | <p>NIH:<br/>                     - We do not know if all eligible participants meeting prespecified entry criteria were enrolled<br/>                     - Sample size is too small to provide confidence in the findings<br/>                     - People assessing the outcomes are not blinded to the participants' interventions<br/>                     JBI: No adequate form</p>                                                                                                                                                         | Fair    |
| Levine, B., & Land, H. (2015)                                                                 | <p>JBI and NIH:<br/>                     - Authors do not mention how many reviewers conducted this study<br/>                     - They do not mention any method to minimize errors in data extraction<br/>                     - No bias assessment is mentioned<br/>                     - No mention of heterogeneity assessment</p>                                                                                                                                                                                                        | Average |
| Ko, K. (2017)                                                                                 | <p>JBI:<br/>                     - No description of post-intervention clinical condition<br/>                     - No adverse or unanticipated events, maybe there were none<br/>                     NIH: No follow-up (last result is the last session)</p>                                                                                                                                                                                                                                                                                   | Fair    |
| Verreault, K. (2017)                                                                          | <p>JBI:<br/>                     - Influence of the researcher on the research, and vice-versa, are unclear<br/>                     NIH:<br/>                     - The exposures of interest are not measured prior to the outcome being measured</p>                                                                                                                                                                                                                                                                                           | Good    |

|                                                                                              |                                                                                                                                                                                                                                                                                                                                                                                                                                                                                              |         |
|----------------------------------------------------------------------------------------------|----------------------------------------------------------------------------------------------------------------------------------------------------------------------------------------------------------------------------------------------------------------------------------------------------------------------------------------------------------------------------------------------------------------------------------------------------------------------------------------------|---------|
| Dieterich-Hartwell, R., Haen, C., Kaimal, G., Koch, S., Villanueva, A., & Goodill, S. (2021) | <p>JB: None</p> <p>NIH:</p> <ul style="list-style-type: none"> <li>- Outcome measures of interest were not taken multiple times before the intervention and multiple times after the intervention</li> <li>- People assessing the outcomes were not blinded to the participants' exposures</li> <li>- The sample size was not sufficiently large to provide confidence in the findings</li> <li>- Not all eligible participants that met entry criteria were enrolled (voluntary)</li> </ul> | Average |
| Ley, C., Krammer, J., Lippert, D., & Barrio, M. (2017)                                       | <p>NIH and JB: No adequate form</p>                                                                                                                                                                                                                                                                                                                                                                                                                                                          | Good    |
| Moe, A. (2014)                                                                               | <p>NIH: No adequate form</p> <p>JB:</p> <ul style="list-style-type: none"> <li>- The congruity between the research methodology and the research question is unclear</li> <li>- The influence of the researcher on the research and vice-versa is not clearly addressed</li> <li>- The conclusions drawn do not report any flow</li> </ul>                                                                                                                                                   | Average |
| Manford, B. (2014)                                                                           | <p>NIH: No adequate form</p> <p>JB:</p> <ul style="list-style-type: none"> <li>- Patient's demographic characteristics were not described</li> <li>- Patient's history is very brief</li> <li>- The intervention procedure is not described at all</li> <li>- Post-intervention clinical condition remains unclear</li> </ul>                                                                                                                                                                | Average |
| Fagnoli, A. (2017)                                                                           | <p>NIH: No adequate form</p> <p>JB:</p> <ul style="list-style-type: none"> <li>- The influence of the researcher on the research, and vice-versa, is not addressed.</li> </ul>                                                                                                                                                                                                                                                                                                               | Good    |
| Koch, S., & Weidinger-von der Recke, B. (2009)                                               | <p>NIH: No adequate form</p> <p>JB:</p> <ul style="list-style-type: none"> <li>- Not clearly described the diagnostic tests or assessment methods and the results</li> <li>- The post-intervention clinical condition is not clearly described</li> </ul>                                                                                                                                                                                                                                    | Fair    |
| Schaeffer, A., & Cornelius-White, J. (2021)                                                  | <p>NIH and JB: No publication bias assessment</p>                                                                                                                                                                                                                                                                                                                                                                                                                                            | Good    |
| Liu, Z., Yang, Z., Xiao, C., Zhang, K., & Osmani, M. (2022)                                  | <p>NIH and JB: No adequate form</p>                                                                                                                                                                                                                                                                                                                                                                                                                                                          | X       |
| Federman, D., Zana-Sterenfeld, G., & Lev-Wiesel, R. (2019)                                   | <p>NIH and JB: No adequate form</p>                                                                                                                                                                                                                                                                                                                                                                                                                                                          | X       |
| Colace, E. (2017)                                                                            | <p>JB:</p> <ul style="list-style-type: none"> <li>- The current clinical condition of the patient on presentation is not clearly described</li> </ul>                                                                                                                                                                                                                                                                                                                                        | Poor    |

|                                            |                                                                                                                                                                                                                                                                                                                                                                                                                                                                                                                                                                                                                                                                                                                  |      |
|--------------------------------------------|------------------------------------------------------------------------------------------------------------------------------------------------------------------------------------------------------------------------------------------------------------------------------------------------------------------------------------------------------------------------------------------------------------------------------------------------------------------------------------------------------------------------------------------------------------------------------------------------------------------------------------------------------------------------------------------------------------------|------|
|                                            | <ul style="list-style-type: none"> <li>- No diagnostic tests or assessment methods, no clear description of the results</li> <li>- Interventions or treatment procedure are not clearly described</li> </ul> <p>NIH: (case series study only)</p> <ul style="list-style-type: none"> <li>- Study question or objective not clearly stated</li> <li>- The intervention is not clearly described</li> <li>- The outcome measures are not clearly defined</li> <li>- No length of follow-up mentioned</li> <li>- No statistical methods</li> <li>- The results are not well-described</li> </ul>                                                                                                                    |      |
|                                            | <p>JB1:</p> <ul style="list-style-type: none"> <li>- Congruity between the research methodology and the research question is unclear</li> <li>- No congruity between the research methodology and the methods used to collect data</li> <li>- No congruity between the research methodology and the representation and analysis of data</li> <li>- Participants and their voices are not adequately represented</li> <li>- Ethical approval not mentioned</li> <li>- Conclusion drawn do not report flow from the analysis or interpretation of the data</li> </ul> <p>NIH:</p>                                                                                                                                  |      |
| Dunphy, K., Elton, M., & Jordan, A. (2014) | <ul style="list-style-type: none"> <li>- Population not clearly specified and defined</li> <li>- Eclectic population (not similar), no inclusion nor exclusion criteria</li> <li>- No mention of the exact sample size</li> <li>- No justification of the sample size</li> <li>- No data analysis</li> <li>- Timeframe non-sufficient to establish an association between exposure and outcome</li> <li>- No variation in exposure</li> <li>- The exposure measures are not defined</li> <li>- Exposure was assessed once, at the end of the session</li> <li>- Outcome assessors were not blinded to the exposure status of participants</li> <li>- Potential confounding variables are not measured</li> </ul> | Poor |
| Streater, O. (2002)                        | NIH and JB1: No adequate form                                                                                                                                                                                                                                                                                                                                                                                                                                                                                                                                                                                                                                                                                    | X    |
| Kurz, M. (2020)                            | NIH: no adequate form<br>JB1: The influence of the researcher on the research, and vice-versa, are not addressed.                                                                                                                                                                                                                                                                                                                                                                                                                                                                                                                                                                                                | Fair |
| Koch, S. (2019)                            | JB1: None<br>NIH: No adequate form                                                                                                                                                                                                                                                                                                                                                                                                                                                                                                                                                                                                                                                                               | Good |

## Study selection

The database search screened 1114 articles. After removing off-topic articles (n=812) and duplicates (n=185), 117 articles were filtered by two researchers using the Rayyan QCRI software. The inclusion and exclusion criteria were applied to article abstracts, titles, and keywords, and 97 articles were excluded.

The two researchers assessed the remaining 20 articles for bias. They excluded 7 articles: 2 were off-topic,<sup>27,28</sup> 3 had the wrong format<sup>29-31</sup> and 2 were of poor quality because they contained too much methodological bias<sup>32,33</sup> (the description of the intervention was too vague, the variables were not clearly established, the data collection and analysis did not correspond to the protocol presented, the sample was not described). They included 13 articles (Figure 1).

## Data analysis

A meta-analysis based on a statistical combination of two or more studies on the same variable<sup>34</sup> could not be performed since the data extraction did not isolate enough quantitative data per studied variables.

The results are presented according to the SWiM protocol<sup>35</sup> and discussed. A list of recommendations for those involved in research and the clinical field is then formulated to shed light on the future theoretical, psychotherapeutic, and psychopathological directions that the practice of dance therapy may take.

## RESULTS

The selection process included 13 studies, conducted in Europe (Germany - 3, Netherlands - 2, Austria - 2, United Kingdom - 2), the United States of America (5 studies) and China (1 study). The selection contains two meta-syntheses, one not including the selected articles, the other including two articles from our selection process. It contains 3 quantitative

studies (1 monocentric and 2 multicentric) and 8 qualitative studies (6 monocentric and 2 multicentric), including 3 case studies. The sample sizes ranged from 1 to 864. Apart from one study that did not report the gender of its population, the samples were predominantly female (6 articles with exclusively female populations and 7 articles with predominantly female populations). The diagnosis of psychotrauma (PTSD and psychological trauma) is systematic. It is associated with migration (4 studies), violence in daily life (4 studies) and war survival (2 studies). Data were collected through semi-structured interviews (5 studies), questionnaires (4 studies) and observations (5 studies). A thematic analysis<sup>26</sup> of the data from these articles isolated 6 major themes: Body and Space, Individual Psychological Factors, Relationship, Group, General Health, Psychological Processes (see Table 4).

Tableau 4

*Thematic analysis*

| Themes                           | Sub-themes                          | Frequence |
|----------------------------------|-------------------------------------|-----------|
| Body and space                   | Bodily sensations and perceptions   | 9         |
|                                  | Movement                            | 5         |
| Individual psychological factors | Emotions                            | 7         |
|                                  | Psychopathological symptoms         | 3         |
|                                  | Identity and mental health          | 7         |
| Relationship                     | Relationship with others            | 8         |
|                                  | Self-expression                     | 3         |
| Group                            | Security                            | 4         |
|                                  | Culture                             | 3         |
|                                  | Group characteristics               | 4         |
| General Health                   | Well-being                          | 4         |
|                                  | Physical pain                       | 3         |
| Psychological process            | Linking affects and representations | 2         |
|                                  | Mental movement                     | 2         |



## **Body and space**

***Bodily sensations and perceptions.*** The studies reviewed have shown that dance therapy improves the sensory-motor perceptions of individuals suffering from psychological trauma. Qualitative studies<sup>10,36-39</sup> point to improved body awareness and the emergence of a mind-body connection through the sensory experience of movement, rhythm, and relaxation. These results are not confirmed by the experimental quantitative study,<sup>40</sup> which measures the evolution of the feeling of self-efficacy related to the body and the perceived level of fitness in participants in a Flamenco session, compared to a control group. The differences between the two groups were not significant (fitness:  $F=0.37$ ,  $p=.549$ ,  $\eta^2=0.01$  and body-related self-efficacy:  $F=0.71$ ,  $p=.405$ ,  $\eta^2=0.02$ ). The authors identify two major limitations to their study: the small sample size and the fact that there was only one Flamenco dance session. The lack of significance is likely related to these limitations. A case study article<sup>41</sup> highlights the mechanisms associated with bodily experience and the mind-body connection. Conducted on a woman diagnosed with borderline personality disorder, it confirms these findings in the presence of a psychiatric diagnosis.

***Movement.*** The studies analyzed demonstrate that dance therapy improves the motor skills of individuals with psychological trauma. The qualitative studies<sup>10,38,42</sup> point to an increase in range of motion, an expansion of movement repertoire, and the creation of a mind-body connection through movement. Repetition of the sessions is essential for participants to become aware of these improvements.<sup>42</sup> The article discussing a case study<sup>43</sup> of a migration-affected woman identifies the experience of the moving and silent body as important in care. However, expression through movement can only occur if the therapists are able to observe and decipher the movement.<sup>10,38</sup>

## **Individual psychological factors**

**Emotions.** The studies retrieved from the databases point to the identification, expression, and externalization of emotions in the case of dance therapy practice for individuals suffering from psychological trauma. The qualitative studies<sup>37-39,44</sup> show an improvement in emotional state, a better recognition of emotions, a focus on emotions, emotional release, and the development of kinesthetic empathy (to feel in one's own body the movement of the other). Two case studies<sup>43,45</sup> state that the emotions expressed were primarily fear, shame, and guilt. Dance therapy promotes the emergence of psychic processes such as awareness and verbalization of affects, as well as a reduction in suffering. The emotional expression promoted by dance therapy allows for the integration of the trauma<sup>43</sup> and the improvement of the emotional experience.<sup>39</sup> However, these improvements are observed during the treatment or just after the last session. It is not possible to know whether they persist over time.

**Identity and mental health.** The selected articles show that dance therapy mobilizes identity factors. Similarly, the mental health of individuals suffering from psychological trauma is improved by dance therapy. The qualitative studies<sup>36-39</sup> indicate that dance therapy mobilizes psychological resources, improves reflexivity and creativity, provokes new feelings of being alive and enjoying the here and now, and initiates the process of empowerment. Additionally, the articles describe a rediscovery of self-encouraged individual and social dimensions (femininity, sensuality, and spirituality). These movements contribute to the reconstruction of the self, increase self-confidence and pride in being oneself. The case studies<sup>41-43</sup> highlight an emergence of a will to move towards the future,<sup>43</sup> an improvement in the ability to think and to be attentive to one's emotional state.<sup>41</sup> These case studies show the construction of a new internal stability.<sup>45</sup> One of the case studies<sup>45</sup> was conducted with a woman with a psychiatric diagnosis of borderline personality disorder. Although the variables studied are numerous and

observed only during the treatment, the results of the studies converge sufficiently to show a positive impact of dance therapy on the mental health of individuals with psychological trauma.

***Psychopathological symptoms.*** The studies reviewed show that dance therapy improves the psychological state of the individuals and reduces specific symptoms of psychiatric pathologies associated with trauma. A non-randomized clinical trial<sup>46</sup> involving 25 women participating in a dance therapy program measured changes in mental distress with the General Health Questionnaire (GHQ12). Mental distress decreased before and after participation ( $t=-1.46$ ,  $p=0.16$ ,  $d=-0.4$ ). Five weeks after the end of the intervention, mental distress remained lower than at the beginning ( $t=-0.54$ ,  $p=0.59$ ,  $d=-0.2$ ), although these decreases were not significant. One article presents a case study<sup>41</sup> conducted on a woman diagnosed with borderline personality disorder and highlights the positive evolution of anxiety and aggression manifestations. However, we noted that the populations in these two studies did not benefit from diagnostic criteria derived from a standard psychiatric nomenclature. A cross-sectional study,<sup>47</sup> with a large sample ( $N=1003$ ), associated the improvement in the psychological state with the flow state. In this study, 899 people answered that they had one or more psychopathologies: traumatic experience ( $N=511$ ), anxiety ( $N=451$ ), depression ( $N=298$ ), chronic pain ( $N=255$ ) and drug addiction ( $N=205$ ). Most of the subjects in this study reported that dance helped them manage their psychopathological disorders (depression 96.3%, anxiety 96.2%, trauma 94.9%, chronic pain 89.4%, and substance abuse, 87.8%). Among these participants, flow state was found to be greater than among those who did not identify any beneficial effect of dance therapy in managing their psychopathological disorders. The correlation between each psychopathological variable and flow state was significant for 276 individuals in the management of depression ( $t(276) = 5.06$ ,  $d = 1.94$ ,  $p < 0.0001$ ), for 434 in the management of anxiety ( $t(434) = 5.58$ ,  $d = 1.52$ ,  $p < 0.0001$ ), for 482 in managing traumatic experience ( $t(482) = 5.84$ ,  $d = 1.30$ ,  $p < 0.0001$ ), and for 237 in managing chronic pain ( $t(237)$

= 4.08,  $d = 0.91$ ,  $p < 0.0001$ ). However, this study<sup>47</sup> is based on individuals' knowledge of psychopathological symptoms, and they may be mistaken or unaware of the existence of these symptoms.

## **Relationship**

***Relationship with others.*** The selected articles show that the use of group dance therapy engages more individuals suffering from trauma to develop interpersonal relationships and improves their relational skills. A comparative experimental quantitative study<sup>40</sup> of a Flamenco dance session highlights significant improvement at  $p < .10$  in participants' perception of boundaries ( $F=3.19$ ,  $p=.084$ ,  $\eta^2=0.10$ ) and personified intersubjectivity ( $F=3.37$ ,  $p=.076$ ,  $\eta^2=0.10$ ). Although the sample was small ( $N=33$ ) and the evaluation was carried out in a single session, these results were obtained in a non-randomized clinical trial<sup>46</sup> of 25 women. A thematic analysis of the patients' discourse shows an improvement in the construction of spatial and bodily limits, and in the ability to create links with others. The qualitative studies<sup>36-39</sup> support these results and highlight the importance of the quality of group support<sup>36</sup> in cultural and social dimensions,<sup>37</sup> as they allow the development of relational skills.<sup>38,39</sup> These results are observed during the dance sessions and at the end of the treatment, but we do not know if these effects are lasting. A case study<sup>45</sup> specifically highlights the importance of the presence of peers during the trauma narrative. Peers accompany the talk with sustained attention and mirroring of the individual's emotional state. In addition, they comfort the individual verbally and/or non-verbally. This prevents too much internal rigidity and reduces the phenomenon of dissociation. Thus, the story does not evoke the trauma suffered. On the other hand, this repetition can take place during the dance, when the body is mobilized.<sup>45</sup> Dance therapy also encourages the expression of the patient's need for space.<sup>43</sup>

***Self-expression.*** Some of the research reviewed shows that dance therapy facilitates and enhances self-expression. The qualitative studies<sup>37,39</sup> highlight an improvement in verbal

expression and an increase in self-expression and freedom of speech in participants during dance therapy sessions. These results are still in evidence after the intervention in one of the two studies.<sup>39</sup> A case study<sup>41</sup> obtained these results with a patient diagnosed with borderline personality disorder. It highlights the exploratory dimension of dance, which promotes the expression of thoughts, behaviors, and emotions. In each study, the authors emphasize that feelings of confidence and safety are facilitators of self-expression.

## **Group**

**Security.** The studies reviewed emphasize the safety function of group dance therapy. Three qualitative studies<sup>36,39,44</sup> indicate that the development of participants' sense of safety, when combined with the development of the ritual, symbolic, and metaphorical aspects of dance, contributes to the development of a generalized sense of safety.<sup>39</sup> The consolidation of a sense of safety allows individual resources to emerge in participants<sup>36</sup> and enables participants to enter into a flow state.<sup>39</sup> Finally, the development and consolidation of this feeling are facilitated by the permanence and the framework of the interventions (quality of the premises, geographical location, regularity).<sup>39</sup>

**Culture.** The selected works show that it is important to consider cultural aspects in the treatment of people suffering from psychological trauma through dance therapy. Indeed, the qualitative studies<sup>36,42</sup> show that cultural, religious and spiritual support<sup>36</sup> is important. When these are provided, the subject's own cultural, family, and environmental resources are diversified.<sup>42</sup> A case study<sup>45</sup> refines these results, showing the importance for the subject of the cultural aspects of their verbal and non-verbal expression. More specifically, dance therapy mobilizes non-verbal skills, which are particularly useful in a multicultural<sup>36</sup> trauma management group.<sup>42</sup> It complements psychosocial interventions because it reinforces cultural and family support.<sup>36,45</sup>

**Group characteristics.** The extracted studies show that specific modalities of dance sessions influence the management of trauma. A cross-sectional study<sup>47</sup> identified the importance of duration (dance practice for more than 5 weeks vs. less than 5 weeks) and frequency (dance practice at least once a week vs. twice a month or less). They were positively correlated with flow state (frequency:  $t(806) = 3.25$ ,  $d = 0.23$ ,  $p = 0.001$ , duration:  $t(840) = 3.11$ ,  $d = 0.22$ ,  $p = 0.002$ ), life satisfaction (duration:  $t(932) = 2.94$ ,  $d = 0.19$ ,  $p = 0.003$ ) and mindfulness (frequency:  $t(850) = 2.72$ ,  $d = 0.19$ ,  $p = 0.007$ , duration:  $t(932) = 7.86$ ,  $d = 0.52$ ,  $p < 0.0001$ ). However, the relationship between the duration and the frequency of dance sessions was not significantly correlated with the intensity of mindfulness ( $F(1,803) = 0.8$ ,  $p = 0.4$ ), nor with life satisfaction ( $F(1,803) = 0.6$ ,  $p = 0.4$ ), nor with flow state ( $F(1,803) = 0.02$ ,  $p = 0.9$ ). The qualitative studies<sup>10,39</sup> add the possibility of creating a new healthy relationship with oneself, the group, the therapist, and the movement.<sup>10</sup> The quality of these relationships depends on the ability of the therapist to consider cultural dimensions, difficulties in verbal expression and the risk of repetition of the trauma.<sup>39</sup> Finally, it is made clear that the quality of the relationships that the subject engages in is conditioned by the therapist's ability to identify obstacles, to engage with the group and to adapt to the patients.<sup>39</sup> Therapists play a critical role in care and must be aware of their own countertransference, their own use of space, and the paradigms contained in their movements.<sup>10</sup> In one study,<sup>10</sup> the therapist's own quality is engaged and poorly described.

## **General Health**

**Well-being.** The articles reviewed reveal that dance therapy improves the overall well-being of individuals suffering from psychological trauma. The quantitative studies<sup>40,46,47</sup> measure different variables of well-being. The non-randomized clinical trial<sup>46</sup> shows results that are interesting but not significant, at  $p < 0.05$ . The measurement of self-esteem using the Rosenberg Self-Esteem Scale (RSES52) shows an increase in self-esteem ( $t = 1.85$ ,  $d = 0.3$ ,  $p =$

0.08) after the dance therapy program, which persists 5 weeks after the end of treatment ( $t = 1.11$ ,  $d = 0.2$ ,  $p = 0.28$ ). This study<sup>46</sup> also used the three dimensions (overattachment, body-mind obstruction, affect posture inhibition) of the Stagnation Scale.<sup>48</sup> It shows an overall decrease in stagnation<sup>1</sup> symptoms ( $t = -0.48$ ,  $d = -0.1$ ,  $p = 0.64$ ), maintained at 5 weeks after completion ( $t = -0.43$ ,  $d = -0.1$ ,  $p = -0.67$ ). Overattachment decreases after care ( $t = -1.63$ ,  $d = -0.2$ ,  $p = 0.12$ ), and then 5 weeks after care ended ( $t = -1.81$ ,  $d = -0.3$ ,  $p = 0.08$ ).

The quantitative experimental study<sup>40</sup> identifies the positive and negative dimensions of well-being. The score for the positive dimension of well-being was not significantly higher after dance therapy ( $F = 0.60$ ,  $p = .445$ ,  $\eta^2 = 0.02$ ). The score for the negative dimension of well-being was significantly lower after dance therapy ( $F = 4.97$ ,  $p = 0.33$ ,  $\eta^2 = 0.14$ ). In addition, this study<sup>40</sup> clearly shows an improvement in perceived health ( $F = 18.71$ ,  $p = .000$ ,  $\eta^2 = 0.38$ ). The cross-sectional study<sup>47</sup> shows that people who have been practicing dance for more than 5 weeks have a higher mindfulness score ( $t(932) = 7.86$ ,  $d = 0.52$ ,  $p < 0.0001$ ). Subjects also had higher levels of life satisfaction ( $t(932) = 2.94$ ,  $d = 0.19$ ,  $p = 0.003$ ) and better flow states ( $t(840) = 3.11$ ,  $d = 0.22$ ,  $p = 0.002$ ). Similarly, in this study<sup>47</sup> and with a different subsample, people who dance at least once a week more have higher mindfulness scores ( $t(850) = 2.72$ ,  $d = 0.19$ ,  $p = 0.007$ ) and better flow ( $t(806) = 3.25$ ,  $d = 0.23$ ,  $p = 0.001$ ), but do not have significantly higher life satisfaction. Two other qualitative studies<sup>39,44</sup> also found improved physical health and flow states in those who participated in dance sessions.

**Physical pain.** The work reviewed emphasizes that dance therapy encourages the expression and recognition of physical pain. The cross-sectional study<sup>47</sup> highlights the usefulness of dance in the management of chronic pain (89.4% of people with chronic pain). Those who reported being helped by dance in the management of their chronic pain had a better flow state compared to those who reported not being helped ( $t(237) = 4.08$ ,  $d = 0.91$ ,  $p <$

---

<sup>1</sup> Stagnation is a concept in Eastern medicine that resembles depression in Western medicine<sup>48</sup>

0.0001). Similarly, the quantitative experimental study<sup>40</sup> measures perceived physical pain before and after a flamenco workshop. After the workshop, and compared to those who did not participate, participants present less physical pain ( $F = 4.25$ ,  $p = .048$ ,  $\eta^2 = 0.12$ ). A case study<sup>43</sup> shows that dance therapy reduces physical pain and the emotional pain related to shame. These studies do not specify whether the effects last beyond the dance therapy intervention, but they are reported through to the end.

## **Psychological process**

*Linking affects and representations.* The extracted research highlights that dance therapy favors the connection of affects in people with psychological trauma. The case study<sup>43</sup> with the 40-year-old affected-migration woman identifies the important role of dance in the expression of her emotions. Physical activity allows for the expression of repressed emotions, which immediately leads to a feeling of liberation and relief. In the case study<sup>41</sup> with a woman diagnosed with borderline personality disorder, dance is used to create distance from her emotional distress, which she described as overwhelming. It is noted that there is a failure of the anamnesis elements in this study,<sup>43</sup> preventing the results of the treatment to be visualized when it is completed. However, the two case studies<sup>41,43</sup> link the subject's affects to somatic expression. They clearly identify the outlet function of movement<sup>43</sup> and establish a correlation between physical psychodynamic movements and psychic movements.<sup>41</sup>

*Mental movement.* The case studies included show that the physical movement of dance induces psychic movement in people who have been frozen by trauma. The case study<sup>45</sup> of a group practicing dance therapy highlights the use of the sensorimotor to initiate trauma integration work. Identifying and activating the processes at the base of the body's resources allows the process of emotional and cognitive integration of the trauma to begin. In this study,<sup>45</sup> the activation of the sensory-motor pole in the subjects allows the reintegration of the fragmented and negatively invested body image. In addition, the case study<sup>43</sup> with the woman



facing migration finely shows the process of resilience in the treatment. Dance therapy enabled this patient to gain a sense of strength and to express intense emotions linked to the past trauma. She succeeded in symbolically lightening herself through movement, in space and in form. The reduction of her symptoms was accompanied by the reintegration of her fragmented body image and the strengthening of her psychic resources. Movement can have a symbolic function, allowing the diversity of affects to emerge and subjecting them to interpretation.<sup>43</sup> The case study with the group<sup>45</sup> also describes a reinstatement of psychic movement through the body.

## **DISCUSSION**

The articles resulting from our selection protocol have shown that the effects of dance therapy include reappropriating the body, expressing emotions, and improving the management of, or even reducing, psychopathological symptoms in people suffering from psychological trauma. Group dance therapy favors self-expression and a new relationship with others. The feeling of safety and the ability of participants to be in a flow state facilitate the emergence of these beneficial effects. They depend on the skill set of the therapists and the regularity, constancy, and stability of the sessions.

Dance therapy improves the sensory-motor perceptions and motor skills of people with psychological trauma. These variables are highlighted by other studies<sup>5,49</sup> conducted on the effects of dance therapy, particularly in prevention contexts and with populations of children with disabilities. We hypothesize several reasons for these findings. First, repeated physical activity is strongly correlated with the development and amelioration of the encoding devoted to motor skills.<sup>50</sup> Second, dance therapy enhances sensory-motor perceptions as it is a potential reminder of the individual primary experience of movement and sound.<sup>51</sup> Third, improved sensory-motor perception enhances body schema,<sup>52</sup> which in turn promotes the development of motor skills. If these hypotheses are confirmed, dance therapy would be particularly effective

for people suffering from psychological trauma, as it would encourage them to redevelop a deep connection with their bodies, which have been distanced by the dissociation and amnesia linked to psychological trauma.<sup>53</sup>

Dance therapy improves the psychological state of people with psychological trauma and promotes the identification, expression, and externalization of emotions. This is consistent with the literature on the effectiveness of dance therapy<sup>5,49,54</sup> in the general population. We hypothesize several reasons for these results. First, an improvement in participants' psychological state correlates with a pre-existing interest for dance and physical activity.<sup>55</sup> Second, dance is a non-verbal medium that allows the expression of emotions through the body while initiating the process of emotional identification.<sup>56</sup> The work of emotions through dance therapy is particularly interesting in the treatment of dissociation (initially caused by psychological trauma) because it is characterized, among other things, by a disruption in the integration of emotions.<sup>14</sup> The psycho-affective register would be strengthened, which would improve mentalization, frozen by sideration during the traumatic event, and would reduce feelings of shame and guilt.<sup>57</sup> Third, reaching a flow state facilitates the improvement of the psychological state<sup>58</sup> because it reduces excessive self-consciousness. This reduction would be positively correlated with the decrease in feelings of shame and guilt related to the psychological trauma,<sup>59</sup> which would facilitate verbal expression in people suffering from psychological trauma.

Dance therapy stimulates self-expression and interpersonal relationships, enhancing the relational skills of people with psychological trauma. This is consistent with the findings of major studies on dance therapy.<sup>5,49,60</sup> We make several assumptions about these findings. First, interpersonal skills are enhanced by the presence of the group, the therapeutic focus of the dance, and non-verbal communication.<sup>5</sup> Second, emotional sharing and the quality of receiving expression encourage self-expression and interpersonal relationships. Third, the development

of interpersonal skills and relationships depends on the quality of the individual's initial attachment.<sup>61</sup> The development of interpersonal skills is important in the management of psychological trauma because social functioning is impaired, resulting in a characteristic sense of detachment from others and from oneself.<sup>14</sup> The quality of the subject's initial attachment is a facilitator of the development of relational skills in people with psychological trauma.<sup>62</sup>

The group dimension of dance therapy develops a sense of personal safety and provides cultural support. These have not been well documented in the current literature in relation to dance therapy. We offer several hypotheses to explain these findings. First, music is integral to personal development and cultural belonging and is, therefore, an important cultural support.<sup>63</sup> Second, the unity of time, place and space of the group contributes to the development of participants' sense of security. The group is an effective tool for people with psychological trauma when the focus of care is specifically on the psychological trauma.<sup>64,65</sup> A sense of safety is essential to the management of psychological trauma because it allows the intrusive re-emergence of the traumatic image, linked to the traumatic memory, to be contained and processed in the group.<sup>57,66</sup> Cultural support and a sense of safety are even more important for people facing migration.<sup>67</sup>

Finally, this systematic review shows an improvement in physical health and psychological processes, in line with the results of the literature.<sup>5,68,69</sup> Physical activity is positively correlated with mental health<sup>68</sup> and its effects depend on the context,<sup>68</sup> the regularity and the intensity of the activity.<sup>70</sup> Compared to physical activity in general, dance is particularly effective in improving physiological body composition, blood biomarkers, and musculoskeletal function.<sup>71</sup> We hypothesize that dance is a particularly effective therapeutic mediator in the management of psychological trauma because sensorimotor activation and its novel intrapsychic processing reduces symptoms related to psychological trauma.<sup>72</sup>

## **Recommendations**

Based on the results of this systematic review, further research should be conducted on the specific effects of dance therapy in the treatment of psychological trauma, with studies that are primarily quantitative but also qualitative. The results highlight the dimensions and variables that specifically need to be explored. To improve clinical management, it is important to emphasize that these results concern mainly women and people facing migration. Moreover, it is relevant to offer this type of therapy more frequently because dance therapy allows the subject with psychological trauma to work on their motor and psychic abilities, emotions, self-expression, sense of security and interpersonal relationships. According to the results, it is important for therapists to pay attention to the stability of their intervention (unity of time, space, and place), to their countertransference and to the patients' flow state. Finally, it is advisable to practice dance therapy with people with psychological trauma in a group setting<sup>65</sup> and to focus the treatment on the psychological trauma.<sup>64</sup> These theoretical supports complements those found in the literature.<sup>31</sup>

## **Strengths and limitations**

The systematic article search was conducted on seven databases, in English and French. Quantitative, qualitative, and case studies were included, allowing for a fine-grained and complex analysis of the results. Bias analysis, performed by two researchers using two tools (NIH and JBI), allowed the exclusion of studies with too much bias. The small number of studies is the main limitation of our study. This led to the inclusion of studies deemed fair in the bias analysis. Finally, the variables studied are too varied to perform a meta-analysis at this time.

## CONCLUSION

Dance therapy is effective with psychological trauma management. It especially adapted for women and people facing migration. It allows them to work on motor skills, psychological state, emotions, self-expression and sense of security, and interpersonal relationships. Physical activity mobilizes and improves physical health, which has repercussions on people's psychological capacities. Its effectiveness is correlated with the quality of the therapist, the stability of the intervention and the patient's flow state. In the absence of significant results, which have yet to be produced by scientific research, we can nevertheless consider that dance therapy increases well-being (self-esteem, depressive state, chronic pain), induces psychic movement, and favors the connection of affects and representations.

## REFERENCES

1. Dunphy K, Federman D, Fischman D, et al. Dance Therapy Today: An Overview of the Profession and Its Practice Around the World. *Creat Arts Educ Ther CAET*. 2022;7(2):158-186. doi:10.15212/caet/2021/7/13
2. Puxeddu V. Chapitre 4. La danse-thérapie. In: *Les art-thérapies*. Collection U. Armand Colin; 2017:120-161. doi:10.3917/arco.lecou.2017.01.0120
3. American Dance Therapy Association. What is Dance/movement Therapy? ADTA. Accessed June 22, 2022. <https://www.adta.org/>
4. Pessoa R, NEVES C, Caputo Ferreira M. Dance therapy in aging: A systematic review. *J Phys Educ Sport*. 2019;19(02):1180-1187. doi:10.7752/jpes.2019.02171
5. Koch SC, Riege RFF, Tisborn K, Biondo J, Martin L, Beelmann A. Effects of Dance Movement Therapy and Dance on Health-Related Psychological Outcomes. A Meta-Analysis Update. *Front Psychol*. 2019;10. Accessed June 15, 2022. <https://www.frontiersin.org/article/10.3389/fpsyg.2019.01806>
6. Wang L li, Sun C jie, Wang Y, et al. Effects of dance therapy on non-motor symptoms in patients with Parkinson's disease: a systematic review and meta-analysis. *Aging Clin Exp Res*. 2022;34(6):1201-1208. doi:10.1007/s40520-021-02030-7
7. Ritter M, Low KG. Effects of dance/movement therapy: A meta-analysis. *Arts Psychother*. 1996;23(3):249-260. doi:10.1016/0197-4556(96)00027-5
8. van de Kamp MM, Scheffers M, Hatzmann J, Emck C, Cuijpers P, Beek PJ. Body- and Movement-Oriented Interventions for Posttraumatic Stress Disorder: A Systematic Review and Meta-Analysis. *J Trauma Stress*. 2019;32(6):967-976. doi:10.1002/jts.22465
9. Taylor J, McLean L, Korner A, Stratton E, Glozier N. Mindfulness and yoga for psychological trauma: systematic review and meta-analysis. *J Trauma Dissociation*. 2020;21(5):536-573. doi:10.1080/15299732.2020.1760167
10. Levine B, Land HM. A Meta-Synthesis of Qualitative Findings About Dance/Movement Therapy for Individuals With Trauma. *Qual Health Res*. 2016;26(3):330-344. doi:10.1177/1049732315589920
11. Pierce L. The integrative power of dance/movement therapy: Implications for the treatment of dissociation and developmental trauma. *Arts Psychother*. 2014;41(1):7-15. doi:10.1016/j.aip.2013.10.002
12. Perrotta G. Psychological Trauma: Definition, Clinical Contexts, Neural Correlations and Therapeutic Approaches Recent Discoveries. Published online January 1, 2020.
13. Janet P. *The Mental State of the Hysterics*. Rueff; 1893.
14. American Psychiatric Association. *Diagnostic and Statistical Manual of Mental Disorders: DSM-5*. 5th edition. American Psychiatric Association; 2013.
15. World Health Organization. *International Classification of Diseases, Eleventh Revision (ICD-11)*.; 2019. Accessed June 23, 2022. <https://icd.who.int/browse11>

16. Koenen KC, Ratanatharathorn A, Ng L, et al. Posttraumatic stress disorder in the World Mental Health Surveys. *Psychol Med*. 2017;47(13):2260-2274. doi:10.1017/S0033291717000708
17. Silva U de, Glover N, Katona C. Prevalence of complex post-traumatic stress disorder in refugees and asylum seekers: systematic review. *BJPsych Open*. 2021;7(6). doi:10.1192/bjo.2021.1013
18. O'Donnell ML, Schaefer I, Varker T, et al. A systematic review of person-centered approaches to investigating patterns of trauma exposure. *Clin Psychol Rev*. 2017;57:208-225. doi:10.1016/j.cpr.2017.08.009
19. Patel R, Spreng RN, Shin LM, Girard TA. Neurocircuitry models of posttraumatic stress disorder and beyond: A meta-analysis of functional neuroimaging studies. *Neurosci Biobehav Rev*. 2012;36(9):2130-2142. doi:10.1016/j.neubiorev.2012.06.003
20. Nemeroff CB, Bremner JD, Foa EB, Mayberg HS, North CS, Stein MB. Posttraumatic stress disorder: A state-of-the-science review. *J Psychiatr Res*. 2006;40(1):1-21. doi:10.1016/j.jpsychires.2005.07.005
21. Hillis S, Mercy J, Amobi A, Kress H. Global Prevalence of Past-year Violence Against Children: A Systematic Review and Minimum Estimates. *Pediatrics*. 2016;137(3):e20154079. doi:10.1542/peds.2015-4079
22. O'Donnell CJ, Schwartz Longacre L, Cohen BE, et al. Posttraumatic Stress Disorder and Cardiovascular Disease: State of the Science, Knowledge Gaps, and Research Opportunities. *JAMA Cardiol*. 2021;6(10):1207-1216. doi:10.1001/jamacardio.2021.2530
23. Green BL, Saunders PA, Power E, et al. Trauma-Informed Medical Care: Patient Response to a Primary Care Provider Communication Training. *J Loss Trauma*. 2016;21(2):147-159. doi:10.1080/15325024.2015.1084854
24. Bassuk EL, Dawson R, Perloff J, Weinreb L. Post-traumatic stress disorder in extremely poor women: implications for health care clinicians. *J Am Med Womens Assoc* 1972. 2001;56(2):79-85.
25. Grabbe L, Miller-Karas E. The Trauma Resiliency Model: A "Bottom-Up" Intervention for Trauma Psychotherapy. *J Am Psychiatr Nurses Assoc*. 2018;24(1):76-84. doi:10.1177/1078390317745133
26. Braun V, Clarke V. Using thematic analysis in psychology. *Qual Res Psychol*. 2006;3(2):77-101. doi:10.1191/1478088706qp063oa
27. Kurz MR. When death precedes birth: The embodied experiences of women with a history of miscarriage or stillbirth—A phenomenological study using artistic inquiry. *Am J Dance Ther*. 2020;42(2):194-222. doi:10.1007/s10465-020-09340-9
28. Federman D, Zana-Sterenfeld G, Lev-Wiesel R. Body movement manual for the assessment and treatment of trauma survivors. *Am J Dance Ther*. 2019;41(1):75-86. doi:10.1007/s10465-019-09298-3
29. Streater OKN. Truth, justice and bodily accountability: Dance movement therapy as an innovative trauma treatment modality. *Body Mov Dance Psychother*. Published online February 18, 2022. doi:10.1080/17432979.2021.2020163

30. Liu Z, Yang Z, Xiao C, Zhang K, Osmani M. An Investigation into Art Therapy Aided Health and Well-Being Research: A 75-Year Bibliometric Analysis. *Int J Environ Res Public Health*. 2021;19(1). doi:10.3390/ijerph19010232
31. Koch SC. Indications and contraindications in dance movement therapy: learning from practitioners' experience. *GMS J Arts Ther 2Doc02*. 2020;1. doi:10.3205/JAT000006
32. Colace E. Dance movement therapy and developmental trauma: dissociation and enactment in a clinical case study. *Body Mov Dance Psychother*. 2017;12(1):36-49. doi:10.1080/17432979.2016.1247115
33. Dunphy K, Elton M, Jordan A. Exploring dance/movement therapy in post-conflict Timor-Leste. *Am J Dance Ther*. 2014;36(2):189-208. doi:10.1007/s10465-014-9175-4
34. Deeks J, Higgins J, Altman D, eds. Chapter 10: Analysing data and undertaking meta-analyses. In: *Cochrane Handbook for Systematic Reviews of Interventions*. Vol 6.3. ; 2022. Accessed June 13, 2022. <https://training.cochrane.org/handbook/current/chapter-10>
35. Campbell M, McKenzie JE, Sowden A, et al. Synthesis without meta-analysis (SWiM) in systematic reviews: reporting guideline. *BMJ*. 2020;368(l6890). doi:10.1136/bmj.l6890
36. Verreault K. Dance/Movement therapy and resilience building with female asylum seekers and refugees: a phenomenological practice based research. *Interv-Int J Ment Health Psychosoc WORK Couns AREAS ARMED Confl*. 2017;15(2):120-135. doi:10.1097/WTF.000000000000150
37. Moe A. Healing Through Movement: The Benefits of Belly Dance for Gendered Victimization. *Affil-J WOMEN Soc WORK*. 2014;29(3):326-339. doi:10.1177/0886109913516454
38. Fagnoli A. Maintaining Stability in the Face of Adversity: Self-Care Practices of Human Trafficking Survivor-Trainers in India. *Am J Dance Ther*. 2017;39(2):226-251. doi:10.1007/s10465-017-9262-4
39. Schaeffer AJ, Cornelius-White JHD. Qualitative studies on body-based interventions for refugees: a meta-synthesis. *Body Mov Dance Psychother*. 2021;16(4):267-285. doi:10.1080/17432979.2021.1893810
40. Koch SC, Wirtz G, Harter C, et al. Embodied self in trauma and self-harm: A pilot study of effects of Flamenco therapy on traumatized inpatients. *J Loss Trauma*. 2019;24(5-6):441-459. doi:10.1080/15325024.2018.1507472
41. Manford B. Insecure attachment and borderline personality disorder: Working with dissociation and the capacity to think. *Body Mov Dance Psychother*. 2014;9(2):93-105. doi:10.1080/17432979.2014.891261
42. Dieterich-Hartwell R, Haen C, Kaimal G, Koch S, Villanueva A, Goodill S. Developing movement experiences with refugees to the United States who have undergone trauma. *Int J Migr Health Soc Care*. 2021;17(1):75-91. doi:10.1108/IJMHS-04-2020-0036
43. Ko KS. A broken heart from a wounded land: The use of Korean scarf dance as a dance/movement therapy intervention for a Korean woman with haan. *Arts Psychother*. 2017;55:64-72. doi:10.1016/j.aip.2017.04.002



44. Ley C, Krammer J, Lippert D, Rato Barrio M. Exploring flow in sport and exercise therapy with war and torture survivors. *Ment Health Phys Act*. 2017;12:83-93. doi:10.1016/j.mhpa.2017.03.002
45. Koch SC, Weidinger-von der Recke B. Traumatized refugees: An integrated dance and verbal therapy approach. *Arts Psychother*. 2009;36(5):289-296. doi:10.1016/j.aip.2009.07.002
46. Ho RTH. A place and space to survive: A dance/movement therapy program for childhood sexual abuse survivors. *Arts Psychother*. 2015;46:9-16. doi:10.1016/j.aip.2015.09.004
47. Laird KT, Vergeer I, Hennelly SE, Siddarth P. Conscious dance: Perceived benefits and psychological well-being of participants. *Complement Ther Clin Pract*. 2021;44:101440. doi:10.1016/j.ctcp.2021.101440
48. Ng S, Chan C, Ho D, Wong Y, Ho R. Stagnation as a Distinct Clinical Syndrome: Comparing 'Yu' (Stagnation) in Traditional Chinese Medicine with Depression. Published online 2006. doi:10.1093/BJSW/BCL008
49. May T, Chan ES, Lindor E, et al. Physical, cognitive, psychological and social effects of dance in children with disabilities: systematic review and meta-analysis. *Disabil Rehabil*. 2021;43(1):13-26. doi:10.1080/09638288.2019.1615139
50. Hirano M, Kubota S, Tanabe S, Koizume Y, Funase K. Interactions Among Learning Stage, Retention, and Primary Motor Cortex Excitability in Motor Skill Learning. *Brain Stimul Basic Transl Clin Res Neuromodulation*. 2015;8(6):1195-1204. doi:10.1016/j.brs.2015.07.025
51. Schott-Billmann F. La danse de l'autre. *Insistance*. 2005;1(1):167-175. doi:10.3917/insi.001.0167
52. Maravita A, Iriki A. Tools for the body (schema). *Trends Cogn Sci*. 2004;8(2):79-86. doi:10.1016/j.tics.2003.12.008
53. van der Kolk BA. Clinical implications of neuroscience research in PTSD. *Ann N Y Acad Sci*. 2006;1071:277-293. doi:10.1196/annals.1364.022
54. Schwender TM, Spengler S, Oedl C, Mess F. Effects of Dance Interventions on Aspects of the Participants' Self: A Systematic Review. *Front Psychol*. 2018;9(1130). doi:10.3389/fpsyg.2018.01130
55. Kruk M, Zarychta K, Horodyska K, et al. What comes first, negative emotions, positive emotions, or moderate-to-vigorous physical activity? *Ment Health Phys Act*. 2019;16:38-42. doi:10.1016/j.mhpa.2019.03.002
56. San-Juan-Ferrer B, Hípola P. Emotional intelligence and dance: a systematic review. *Res Dance Educ*. 2020;21(1):57-81. doi:10.1080/14647893.2019.1708890
57. Salmona M. Chapitre 19. Impact des violences sexuelles sur la santé des victimes : la mémoire traumatique à l'œuvre. In: *Pratique de la psychothérapie EMDR*. Psychothérapies. Dunod; 2017:207-218. doi:10.3917/dunod.tarqu.2017.01.0207
58. Riva E, Freire T, Bassi M. The Flow Experience in Clinical Settings: Applications in Psychotherapy and Mental Health Rehabilitation. In: Harmat L, Ørsted Andersen F, Ullén F, Wright J, Sadlo G,

- eds. *Flow Experience: Empirical Research and Applications*. Springer International Publishing; 2016:309-326. doi:10.1007/978-3-319-28634-1\_19
59. Øktedalen T, Hoffart A, Langkaas TF. Trauma-related shame and guilt as time-varying predictors of posttraumatic stress disorder symptoms during imagery exposure and imagery rescripting—A randomized controlled trial. *Psychother Res*. 2015;25(5):518-532. doi:10.1080/10503307.2014.917217
  60. Takahashi H, Matsushima K, Kato T. The Effectiveness of Dance/Movement Therapy Interventions for Autism Spectrum Disorder: A Systematic Review. *Am J Dance Ther*. 2019;41(1):55-74. doi:10.1007/s10465-019-09296-5
  61. Fraley RC, Vicary AM, Brumbaugh CC, Roisman GI. Patterns of stability in adult attachment: An empirical test of two models of continuity and change. *J Pers Soc Psychol*. 2011;101(5):974-992. doi:10.1037/a0024150
  62. Goldstein AL, Haller S, Mackinnon SP, Stewart SH. Attachment anxiety and avoidance, emotion dysregulation, interpersonal difficulties and alcohol problems in emerging adulthood. *Addict Res Theory*. 2019;27(2):130-138. doi:10.1080/16066359.2018.1464151
  63. Trevarthen C, Malloch SN. The Dance of Wellbeing: Defining the Musical Therapeutic Effect. *Nor Tidsskr Musikkter*. 2000;9(2):3-17. doi:10.1080/08098130009477996
  64. Watkins LE, Sprang KR, Rothbaum BO. Treating PTSD: A Review of Evidence-Based Psychotherapy Interventions. *Front Behav Neurosci*. 2018;12(258). doi:10.3389/fnbeh.2018.00258
  65. Sloan DM, Feinstein BA, Gallagher MW, Beck JG, Keane TM. Efficacy of group treatment for posttraumatic stress disorder symptoms: A meta-analysis. *Psychol Trauma Theory Res Pract Policy*. 2013;5(2):176-183. doi:10.1037/a0026291
  66. Kruse J, Joksimovic L, Cavka M, Wöller W, Schmitz N. Effects of trauma-focused psychotherapy upon war refugees: Psychotherapy With Refugees. *J Trauma Stress*. 2009;22(6):585-592. doi:10.1002/jts.20477
  67. Kira IA, Tummala-Narra P. Psychotherapy with Refugees: Emerging Paradigm. *J Loss Trauma*. 2015;20(5):449-467. doi:10.1080/15325024.2014.949145
  68. White RL, Babic MJ, Parker PD, Lubans DR, Astell-Burt T, Lonsdale C. Domain-Specific Physical Activity and Mental Health: A Meta-analysis. *Am J Prev Med*. 2017;52(5):653-666. doi:10.1016/j.amepre.2016.12.008
  69. Karkou V, Aithal S, Zubala A, Meekums B. Effectiveness of Dance Movement Therapy in the Treatment of Adults With Depression: A Systematic Review With Meta-Analyses. *Front Psychol*. 2019;10(936). doi:10.3389/fpsyg.2019.00936
  70. Chastin SFM, Abaraogu U, Bourgois JG, et al. Effects of Regular Physical Activity on the Immune System, Vaccination and Risk of Community-Acquired Infectious Disease in the General Population: Systematic Review and Meta-Analysis. *Sports Med*. 2021;51(8):1673-1686. doi:10.1007/s40279-021-01466-1

71. Fong Yan A, Cobley S, Chan C, et al. The Effectiveness of Dance Interventions on Physical Health Outcomes Compared to Other Forms of Physical Activity: A Systematic Review and Meta-Analysis. *Sports Med.* 2018;48(4):933-951. doi:10.1007/s40279-017-0853-5
72. Langmuir JI, Kirsh SG, Classen CC. A pilot study of body-oriented group psychotherapy: Adapting sensorimotor psychotherapy for the group treatment of trauma. *Psychol Trauma Theory Res Pract Policy.* 2012;4(2):214-220. doi:10.1037/a0025588
